# Supplementary material
Source: PubMed Central journal article supplement (PMC6540791)

# Supplemental Figure 1

## A

PBS

CPA (150 mg/kg)

8 wks, 24 hrs

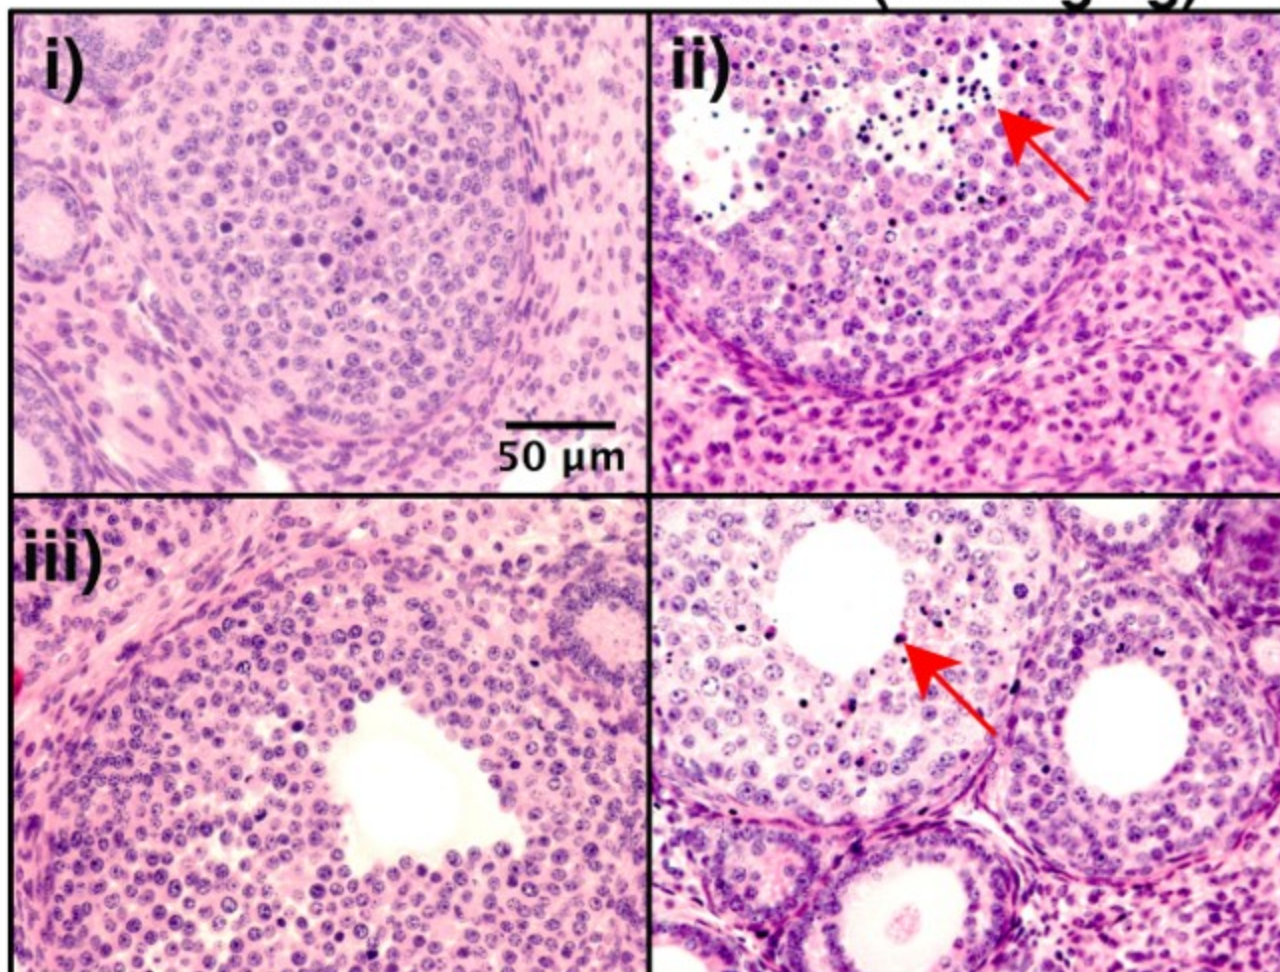

## C

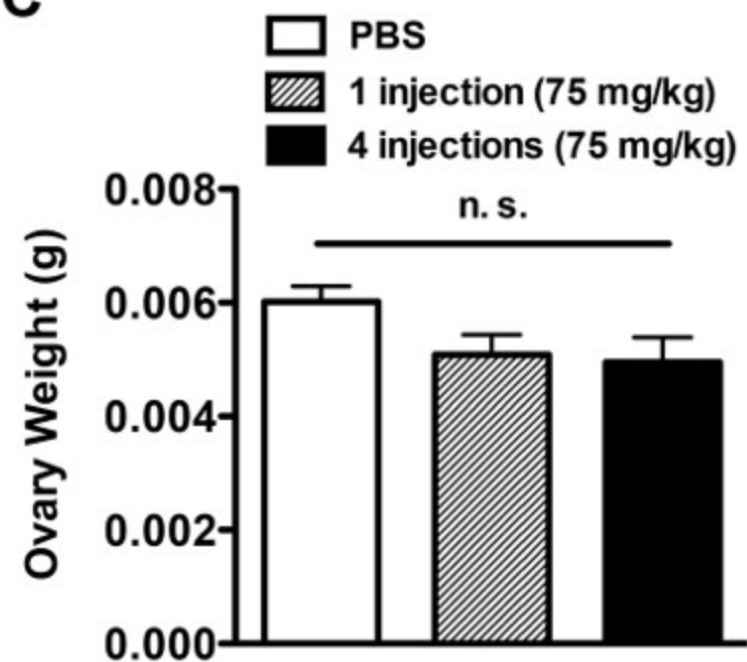

## D

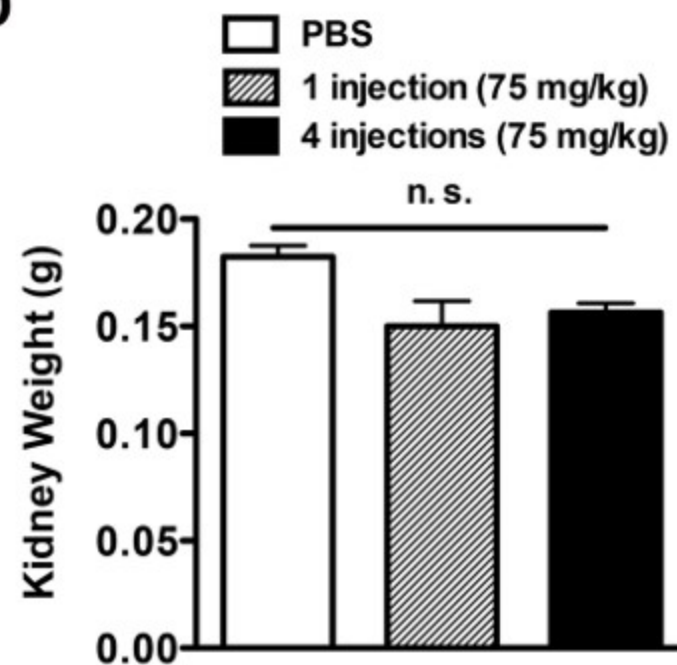

## B

8 wks, 24 hrs

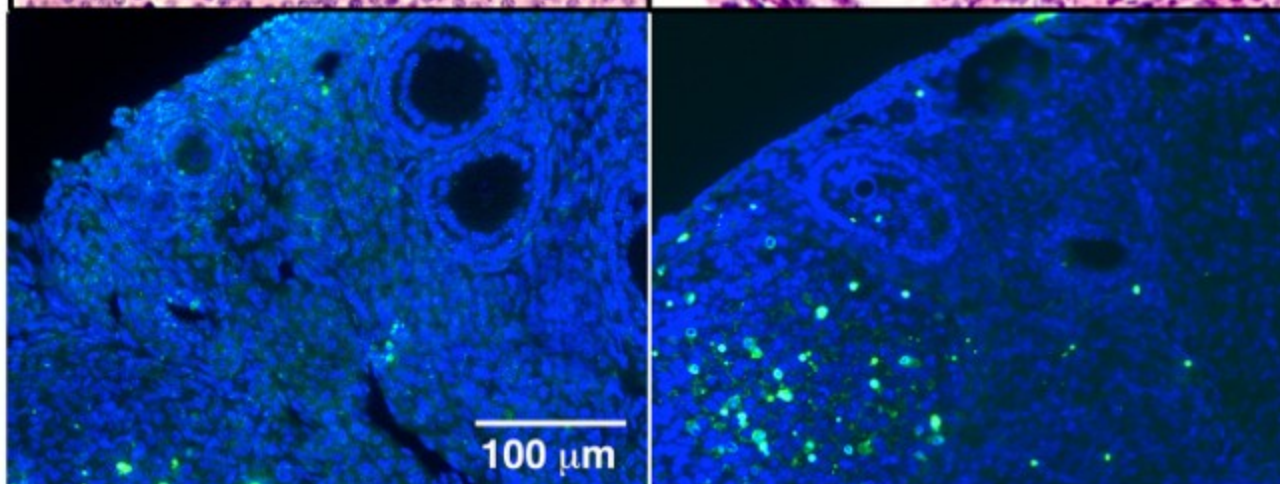

# Supplemental Figure 2

**A**

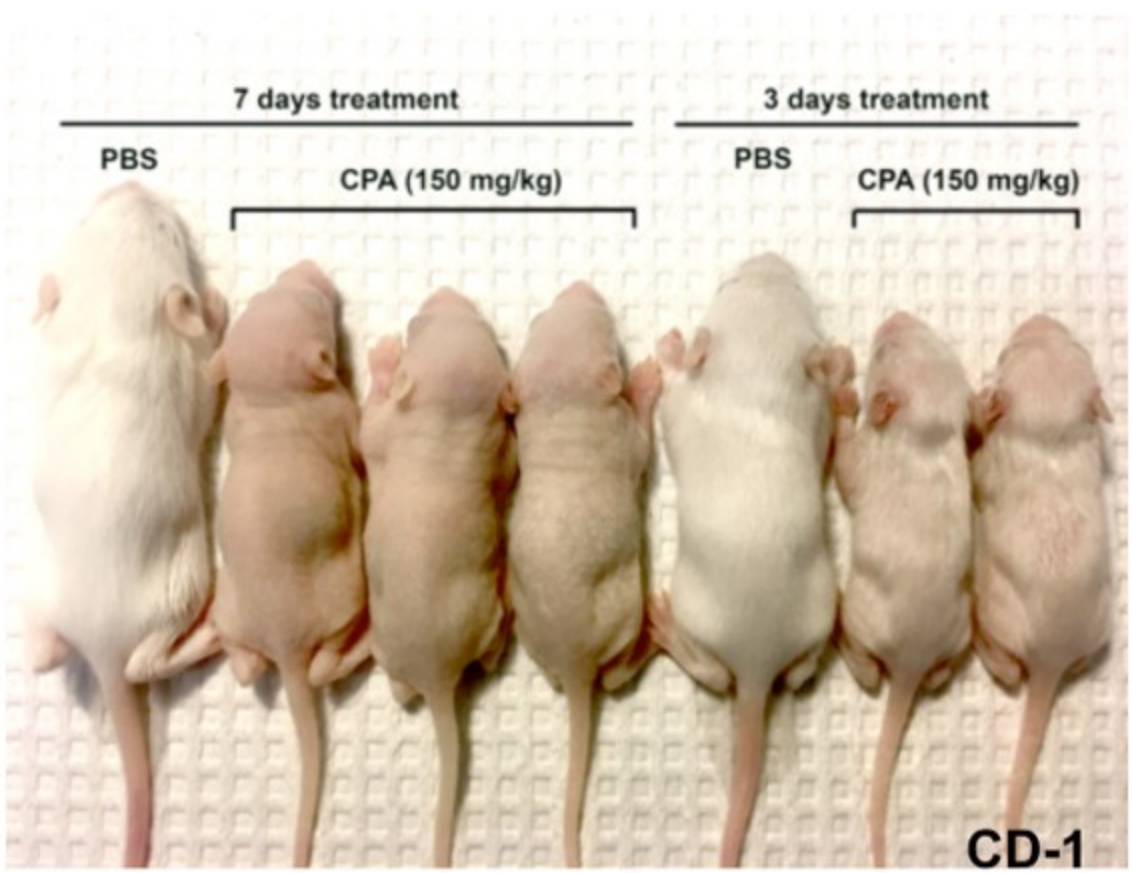

**B**

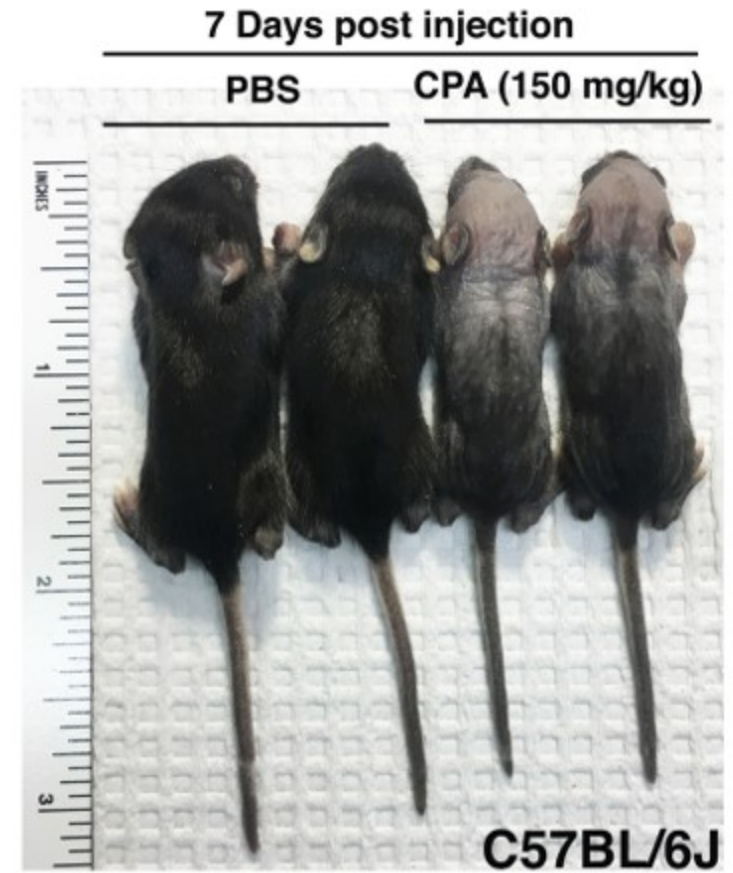

**C**

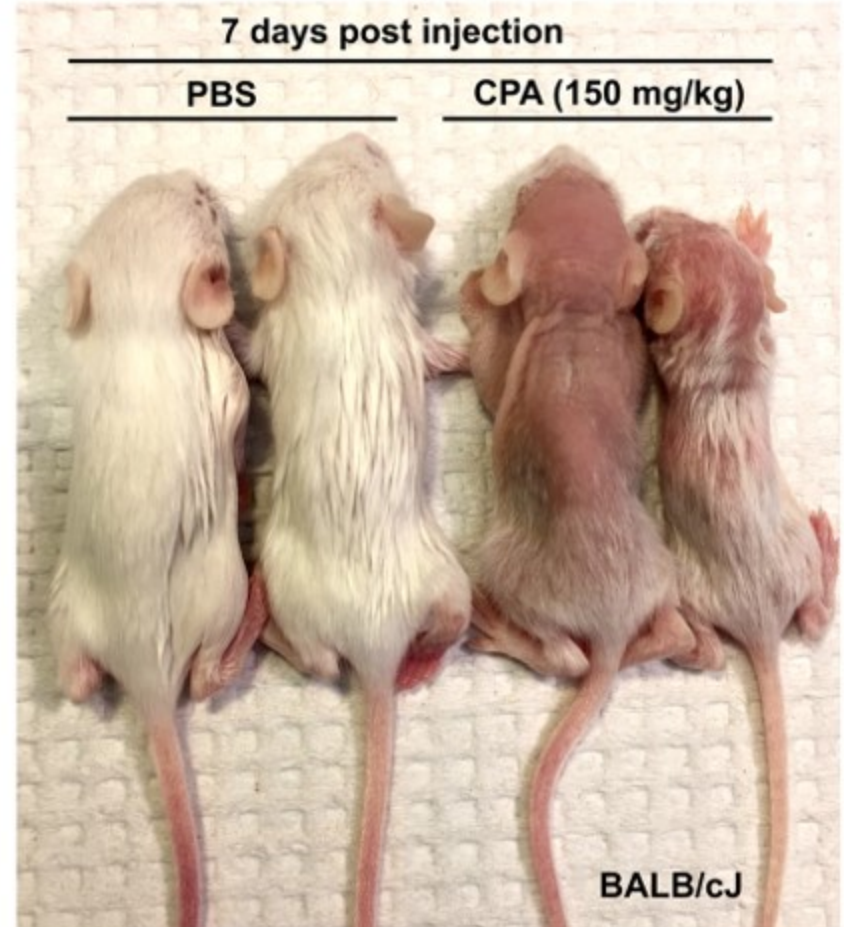

**D**

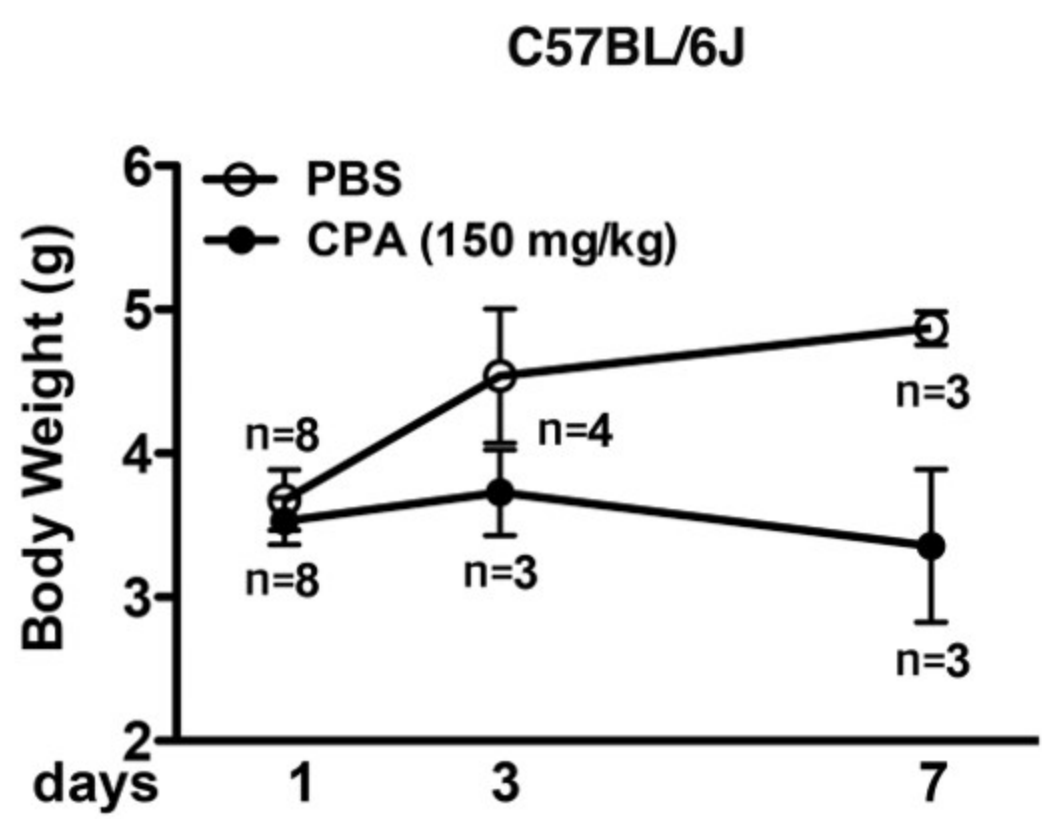

# Supplemental Figure 3

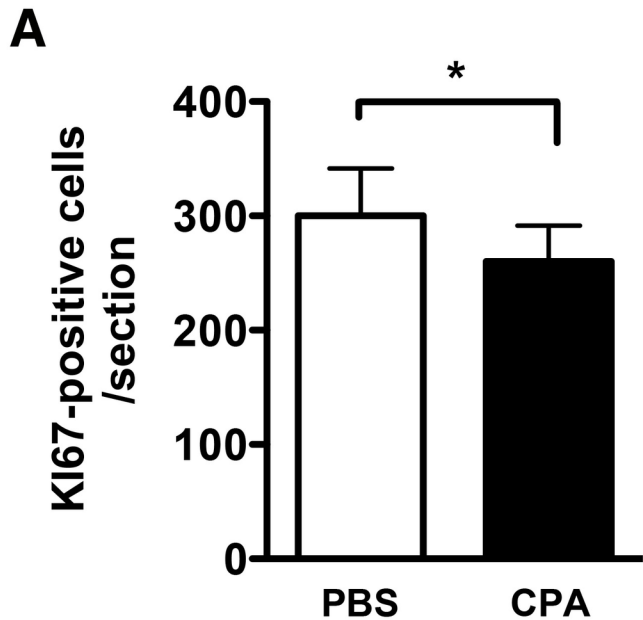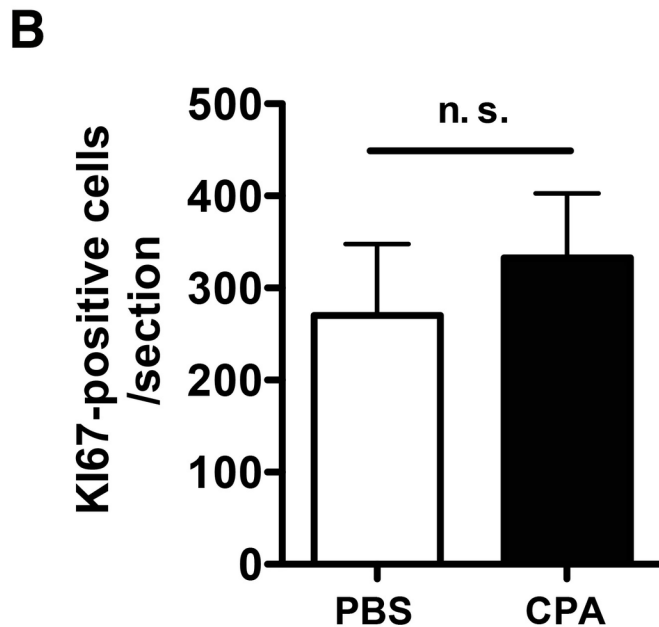

Supplement: NIHMS1026993-supplement-Supplementary_Figures.pdf [file NIHMS1026993-supplement-Supplementary_Figures.pdf]
